# Supplementary material for: Reasons for disagreement regarding illnesses between older patients with multimorbidity and their GPs – a qualitative study
Source: Springer Nature journal article supplement (doi:10.1186/s12875-015-0286-x), 2015-06-01
Supplement: MOESM1 [file 9737712]

## Additional file 1: Interview Guide for Focus Groups with GPs

| Topic                                             | Questions/Instructions                                                                                                                                                                                                                                                                                                                                                                                                                                                                                                                                                                                                                                                                                                                                                                                                                                    |
|---------------------------------------------------|-----------------------------------------------------------------------------------------------------------------------------------------------------------------------------------------------------------------------------------------------------------------------------------------------------------------------------------------------------------------------------------------------------------------------------------------------------------------------------------------------------------------------------------------------------------------------------------------------------------------------------------------------------------------------------------------------------------------------------------------------------------------------------------------------------------------------------------------------------------|
| Welcome                                           | 1) Welcoming the participants<br>2) Introduction to the topic<br>3) Tips for conduction<br>4) Collecting consent for audio recordings<br>5) Confidentiality reminder<br>6) Personal introductions                                                                                                                                                                                                                                                                                                                                                                                                                                                                                                                                                                                                                                                         |
| Questions regarding the introduction to the topic | <p>When you think of conversations with your multimorbid, elderly patients, are there scenarios where you had the feeling that your patient did not understand everything? Or that the patient couldn't or didn't want to listen to you?</p> <p>Or do you sometimes have the feeling that patients want to tell you something, but then don't bring it up?</p> <p>Do you have the feeling that your patients don't understand everything you say? If so, what and why?</p> <p>Are there perhaps other reasons why you don't know certain things about your patients?</p> <p>How would you rate the consensus between general practitioner (GP) and patient regarding the patients' diseases i.e. to what percentage do the patients report a disease which the GP also reports?<br/>           What would your estimate of the average percentage be?</p> |
| Introducing the study thus far                    | <p>A short Power Point presentation on the results of the previous study on the agreement between GPs and patients</p>                                                                                                                                                                                                                                                                                                                                                                                                                                                                                                                                                                                                                                                                                                                                    |
| Discussing the results                            | <p>What is your impression of the results on the agreement between GPs and their patients?</p> <p>What could be causes for the lacking agreement between GPs and their patients?</p> <p>My colleague will write down the topics you name on cards and post them on the wall.</p> <p>Possible topics to enquire on:</p> <ul style="list-style-type: none"> <li>• Treatment through specialists</li> <li>• Certain types of patients</li> <li>• Certain diseases/illnesses</li> <li>• Diagnoses with more intensive therapies vs. non-specific syndromes</li> <li>• Compliance problems</li> <li>• Communication issues</li> <li>• A lack of time</li> <li>• Cognitive problems</li> <li>• ð</li> </ul>                                                                                                                                                     |
| Enquire on                                        | <p>We have now collected several reasons why GPs and</p>                                                                                                                                                                                                                                                                                                                                                                                                                                                                                                                                                                                                                                                                                                                                                                                                  |

| <b>Topic</b>                                                               | <b>Questions/Instructions</b>                                                                                                                                                                                     |
|----------------------------------------------------------------------------|-------------------------------------------------------------------------------------------------------------------------------------------------------------------------------------------------------------------|
| Consequences for healthcare provision and recommendations for improvements | <p>patients might not agree on the patients illnesses on cards.<br/>What does this mean for you?</p> <p>What do you recommend to improve healthcare provision?</p> <p>+ Questions that arise from the context</p> |
| Conclusion                                                                 | <p>1) Final summarization<br/>2) Thank you and goodbye</p>                                                                                                                                                        |
